# Supplementary material
Source: ML conference proceedings conference paper supplement (https://openreview.net/forum?id=U2jxHXuOX9)
Supplement: supplementary_material [file herald_lean_dag_sample.xlsx]

## Sheet: herald_lean_dag
Herald ID	LEAN Source	LEAN Compilation Status	LEAN Compilation Output	REPL Execution Status	REPL Output
0	import Mathlib.Logic.Equiv.Set import Mathlib.Order.RelIso.Set import Mathlib.Order.WellFounded import Mathlib.Order.InitialSeg namespace myNameSpace open InitialSeg variable {α : Type*} {β : Type*} {γ : Type*} {r : α → α → Prop} {s : β → β → Prop} {t : γ → γ → Prop} open Function theorem InitialSeg.eq [IsWellOrder β s] (f g : r ≼i s) (a) : f a = g a := by rw [Subsingleton.elim f g] end myNameSpa…	TRUE		TRUE	{"tactics": [{"tactic": "rw [Subsingleton.elim f g]", "proofState": 0, "pos": {"line": 15, "column": 2}, "goals": "α : Type u_1 β : Type u_2 r : α → α → Prop s : β → β → Prop inst✝ : IsWellOrder β s f g : r ≼i s a : α ⊢ f a = g a", "endPos": {"line": 15, "column": 28}}], "env": 0} ✔ [2/22] Built REPL.Util.Pickle ✔ [3/22] Built REPL.Util.Pickle:c.o ✔ [4/22] Built REPL.Frontend ✔ [5/22] Built REPL.…
1	import Mathlib.Logic.Equiv.Set import Mathlib.Order.RelIso.Set import Mathlib.Order.WellFounded import Mathlib.Order.InitialSeg namespace myNameSpace open PrincipalSeg variable {α : Type*} {β : Type*} {γ : Type*} {r : α → α → Prop} {s : β → β → Prop} {t : γ → γ → Prop} open Function theorem PrincipalSeg.top_eq [IsWellOrder γ t] (e : r ≃r s) (f : r ≺i t) (g : s ≺i t) : f.top = g.top := by rw [Subs…	TRUE		TRUE	{"tactics": [{"tactic": "rw [Subsingleton.elim f (PrincipalSeg.equivLT e g)]", "proofState": 0, "pos": {"line": 15, "column": 2}, "goals": "α : Type u_1\nβ : Type u_2\nγ : Type u_3\nr : α → α → Prop\ns : β → β → Prop\nt : γ → γ → Prop\ninst✝ : IsWellOrder γ t\ne : r ≃r s\nf : r ≺i t\ng : s ≺i t\n⊢ f.top = g.top", "endPos": {"line": 15, "column": 53}}, {"tactic": "rfl", "proofState": 1, "pos": {"l…
2	import Mathlib.Analysis.InnerProductSpace.Orthogonal import Mathlib.Analysis.Normed.Group.AddTorsor import Mathlib.Geometry.Euclidean.PerpBisector namespace myNameSpace open AffineSubspace open Set open scoped RealInnerProductSpace variable {V P : Type*} [NormedAddCommGroup V] [InnerProductSpace ℝ V] [MetricSpace P] variable [NormedAddTorsor V P] variable [NormedAddTorsor V P] variable {c c₁ c₂ p…	TRUE		TRUE	{"tactics": [{"tactic": "rw [← nonempty_iff_ne_bot]", "proofState": 0, "pos": {"line": 17, "column": 2}, "goals": "V : Type u_1\nP : Type u_2\ninst✝⁴ : NormedAddCommGroup V\ninst✝³ : InnerProductSpace ℝ V\ninst✝² : MetricSpace P\ninst✝¹ inst✝ : NormedAddTorsor V P\np₁ p₂ : P\n⊢ perpBisector p₁ p₂ ≠ ⊥", "endPos": {"line": 17, "column": 28}}, {"tactic": "exact perpBisector_nonempty", "proofState": …
3	import Mathlib.CategoryTheory.Functor.KanExtension.Basic import Mathlib.CategoryTheory.Functor.KanExtension.Pointwise namespace myNameSpace open CategoryTheory open Functor open LeftExtension open IsPointwiseLeftKanExtensionAt open Category Limits variable {C D H : Type*} [Category C] [Category D] [Category H] (L : C ⥤ D) (F : C ⥤ H) variable {F L} variable (E : LeftExtension L F) variable (E : L…	TRUE		TRUE	{"tactics": [{"tactic": "dsimp", "proofState": 0, "pos": {"line": 23, "column": 4}, "goals": "C : Type u_1\nD : Type u_2\nH : Type u_3\ninst✝² : Category.{?u.2125, u_1} C\ninst✝¹ : Category.{?u.2129, u_2} D\ninst✝ : Category.{?u.2133, u_3} H\nL : C ⥤ D\nF : C ⥤ H\nE✝¹ E✝ : L.LeftExtension F\nY : D\nE E' : L.LeftExtension F\nφ : E ⟶ E'\nG : CostructuredArrow L Y\n⊢ ((fun E => E.coconeAt Y) E).ι.ap…
4	import Mathlib.Logic.Equiv.Set import Mathlib.Order.RelIso.Set import Mathlib.Order.WellFounded import Mathlib.Order.InitialSeg namespace myNameSpace open PrincipalSeg variable {α : Type*} {β : Type*} {γ : Type*} {r : α → α → Prop} {s : β → β → Prop} {t : γ → γ → Prop} open Function theorem PrincipalSeg.topLTTop {r : α → α → Prop} {s : β → β → Prop} {t : γ → γ → Prop} [IsWellOrder γ t] (f : Princ…	TRUE		TRUE	{"tactics": [{"tactic": "rw [Subsingleton.elim h (f.trans g)]", "proofState": 0, "pos": {"line": 16, "column": 2}, "goals": "α : Type u_1\nβ : Type u_2\nγ : Type u_3\nr : α → α → Prop\ns : β → β → Prop\nt : γ → γ → Prop\ninst✝ : IsWellOrder γ t\nf : r ≺i s\ng : s ≺i t\nh : r ≺i t\n⊢ t h.top g.top", "endPos": {"line": 16, "column": 38}}, {"tactic": "apply PrincipalSeg.lt_top", "proofState": 1, "po…
5	import Mathlib.CategoryTheory.Monoidal.OfChosenFiniteProducts.Symmetric import Mathlib.CategoryTheory.Limits.Constructions.FiniteProductsOfBinaryProducts import Mathlib.CategoryTheory.ChosenFiniteProducts namespace myNameSpace open CategoryTheory open ChosenFiniteProducts variable {C : Type u} [Category.{v} C] [ChosenFiniteProducts C] open MonoidalCategory theorem CategoryTheory.ChosenFiniteProdu…	TRUE		TRUE	{"tactics": [{"tactic": "simp [lift, fst]", "proofState": 0, "pos": {"line": 14, "column": 2}, "goals": "C : Type u\ninst✝¹ : Category.{v, u} C\ninst✝ : ChosenFiniteProducts C\nT X Y : C\nf : T ⟶ X\ng : T ⟶ Y\n⊢ lift f g ≫ fst X Y = f", "endPos": {"line": 14, "column": 18}}], "env": 0}
6	import Mathlib.Analysis.InnerProductSpace.Orthogonal import Mathlib.Analysis.Normed.Group.AddTorsor import Mathlib.Geometry.Euclidean.PerpBisector namespace myNameSpace open AffineSubspace open Set open scoped RealInnerProductSpace variable {V P : Type*} [NormedAddCommGroup V] [InnerProductSpace ℝ V] [MetricSpace P] variable [NormedAddTorsor V P] variable [NormedAddTorsor V P] variable {c c₁ c₂ p…	TRUE		TRUE	{"tactics": [{"tactic": "simp only [mem_perpBisector_iff_dist_eq, dist_comm]", "proofState": 0, "pos": {"line": 17, "column": 2}, "goals": "V : Type u_1\nP : Type u_2\ninst✝⁴ : NormedAddCommGroup V\ninst✝³ : InnerProductSpace ℝ V\ninst✝² : MetricSpace P\ninst✝¹ inst✝ : NormedAddTorsor V P\nc p₁ p₂ : P\n⊢ c ∈ perpBisector p₁ p₂ ↔ dist p₁ c = dist p₂ c", "endPos": {"line": 17, "column": 53}}], "mes…
7	import Mathlib.Analysis.InnerProductSpace.Orthogonal import Mathlib.Analysis.Normed.Group.AddTorsor import Mathlib.Geometry.Euclidean.PerpBisector namespace myNameSpace open AffineSubspace open Set open scoped RealInnerProductSpace variable {V P : Type*} [NormedAddCommGroup V] [InnerProductSpace ℝ V] [MetricSpace P] variable [NormedAddTorsor V P] variable [NormedAddTorsor V P] variable {c c₁ c₂ p…	TRUE		TRUE	{"tactics": [{"tactic": "simpa [mem_perpBisector_iff_inner_eq_inner] using eq_comm", "proofState": 0, "pos": {"line": 17, "column": 2}, "goals": "V : Type u_1\nP : Type u_2\ninst✝⁴ : NormedAddCommGroup V\ninst✝³ : InnerProductSpace ℝ V\ninst✝² : MetricSpace P\ninst✝¹ inst✝ : NormedAddTorsor V P\np₁ p₂ : P\n⊢ p₂ ∈ perpBisector p₁ p₂ ↔ p₁ = p₂", "endPos": {"line": 17, "column": 59}}], "messages": […
8	import Mathlib.CategoryTheory.Monoidal.OfChosenFiniteProducts.Symmetric import Mathlib.CategoryTheory.Limits.Constructions.FiniteProductsOfBinaryProducts import Mathlib.CategoryTheory.ChosenFiniteProducts namespace myNameSpace open CategoryTheory open ChosenFiniteProducts variable {C : Type u} [Category.{v} C] [ChosenFiniteProducts C] open MonoidalCategory theorem CategoryTheory.ChosenFiniteProdu…	TRUE		TRUE	{"tactics": [{"tactic": "simp [lift, snd]", "proofState": 0, "pos": {"line": 14, "column": 2}, "goals": "C : Type u\ninst✝¹ : Category.{v, u} C\ninst✝ : ChosenFiniteProducts C\nT X Y : C\nf : T ⟶ X\ng : T ⟶ Y\n⊢ lift f g ≫ snd X Y = g", "endPos": {"line": 14, "column": 18}}], "env": 0}
9	import Mathlib.CategoryTheory.Comma.Over import Mathlib.Tactic.CategoryTheory.Elementwise import Mathlib.CategoryTheory.Comma.Presheaf namespace myNameSpace open CategoryTheory open OverPresheafAux open YonedaCollection open Category Opposite variable {C : Type u} [Category.{v} C] {A : Cᵒᵖ ⥤ Type v} variable {F : (CostructuredArrow yoneda A)ᵒᵖ ⥤ Type v} {X : C} theorem CategoryTheory.OverPresheaf…	TRUE		TRUE	{"tactics": [{"tactic": "aesop_cat", "proofState": 0, "pos": {"line": 16, "column": 2}, "goals": "C : Type u\ninst✝ : Category.{v, u} C\nA : Cᵒᵖ ⥤ Type v\nF : (CostructuredArrow yoneda A)ᵒᵖ ⥤ Type v\nX : C\n⊢ map₁ (𝟙 F) = id", "endPos": {"line": 16, "column": 11}}], "env": 0}
10	import Mathlib.CategoryTheory.Functor.KanExtension.Basic import Mathlib.CategoryTheory.Functor.KanExtension.Pointwise namespace myNameSpace open CategoryTheory open Functor open LeftExtension open IsPointwiseLeftKanExtension open Category Limits variable {C D H : Type*} [Category C] [Category D] [Category H] (L : C ⥤ D) (F : C ⥤ H) variable {F L} variable (E : LeftExtension L F) variable (E : Lef…	TRUE		TRUE	{"tactics": [{"tactic": "dsimp", "proofState": 0, "pos": {"line": 23, "column": 4}, "goals": "C : Type u_1\nD : Type u_2\nH : Type u_3\ninst✝² : Category.{?u.2125, u_1} C\ninst✝¹ : Category.{?u.2129, u_2} D\ninst✝ : Category.{?u.2133, u_3} H\nL : C ⥤ D\nF : C ⥤ H\nE✝¹ E✝ : L.LeftExtension F\nY : D\nE E' : L.LeftExtension F\nφ : E ⟶ E'\nG : CostructuredArrow L Y\n⊢ ((fun E => E.coconeAt Y) E).ι.ap…
11	import Mathlib.CategoryTheory.Comma.Over import Mathlib.Tactic.CategoryTheory.Elementwise import Mathlib.CategoryTheory.Comma.Presheaf namespace myNameSpace open CategoryTheory open OverPresheafAux open Category Opposite variable {C : Type u} [Category.{v} C] {A : Cᵒᵖ ⥤ Type v} variable {F : (CostructuredArrow yoneda A)ᵒᵖ ⥤ Type v} {X : C} variable {F : (CostructuredArrow yoneda A)ᵒᵖ ⥤ Type v} {X…	TRUE		TRUE	{"tactics": [{"tactic": "simp", "proofState": 0, "pos": {"line": 17, "column": 2}, "goals": "C : Type u\ninst✝ : Category.{v, u} C\nA : Cᵒᵖ ⥤ Type v\nF : (CostructuredArrow yoneda A)ᵒᵖ ⥤ Type v\ns : CostructuredArrow yoneda A\nx : F.obj (op s)\n⊢ YonedaCollection.fst (counitForward F s x).val = s.hom", "endPos": {"line": 17, "column": 6}}], "env": 0}
12	namespace myNameSpace Unable to analyze theorem CategoryTheory.Functor.RightExtension.IsPointwiseRightKanExtensionAt.isIso_hom_app {X : C} (h : E.IsPointwiseRightKanExtensionAt (L.obj X)) [L.Full] [L.Faithful] : IsIso (E.hom.app X) := by simpa using h.isIso_π_app_of_isInitial _ StructuredArrow.mkIdInitial end myNameSpace	FALSE	✖ [11/13] Building TmpProjDir.Basic trace: .> LEAN_PATH=././.lake/packages/batteries/.lake/build/lib:././.lake/packages/Qq/.lake/build/lib:././.lake/packages/aesop/.lake/build/lib:././.lake/packages/proofwidgets/.lake/build/lib:././.lake/packages/Cli/.lake/build/lib:././.lake/packages/importGraph/.lake/build/lib:././.lake/packages/mathlib/.lake/build/lib:././.lake/packages/REPL/.lake/build/lib:./…	FALSE	Skipped as LEAN compilation failed
13	import Mathlib.AlgebraicGeometry.Morphisms.Basic import Mathlib.RingTheory.RingHomProperties import Mathlib.AlgebraicGeometry.Morphisms.Constructors namespace myNameSpace open AlgebraicGeometry open TopologicalSpace CategoryTheory CategoryTheory.Limits Opposite variable (P : ∀ {α β : Type u} [TopologicalSpace α] [TopologicalSpace β] (_ : α → β), Prop) theorem AlgebraicGeometry.topologically_iso_l…	TRUE		TRUE	{"tactics": [{"tactic": "intro X Y e (he : IsIso e)", "proofState": 0, "pos": {"line": 15, "column": 2}, "goals": "P : {α β : Type u} → [inst : TopologicalSpace α] → [inst : TopologicalSpace β] → (α → β) → Prop\nhP : ∀ {α β : Type u} [inst : TopologicalSpace α] [inst_1 : TopologicalSpace β] (f : α ≃ₜ β), P ⇑f\n⊢ MorphismProperty.isomorphisms Scheme ≤ topologically fun {α β} [TopologicalSpace α] […
14	namespace myNameSpace Unable to analyze theorem CategoryTheory.OverPresheafAux.YonedaCollection.map₂_id : YonedaCollection.map₂ F (𝟙 X) = id := by ext; all_goals simp end myNameSpace	FALSE	✖ [11/13] Building TmpProjDir.Basic trace: .> LEAN_PATH=././.lake/packages/batteries/.lake/build/lib:././.lake/packages/Qq/.lake/build/lib:././.lake/packages/aesop/.lake/build/lib:././.lake/packages/proofwidgets/.lake/build/lib:././.lake/packages/Cli/.lake/build/lib:././.lake/packages/importGraph/.lake/build/lib:././.lake/packages/mathlib/.lake/build/lib:././.lake/packages/REPL/.lake/build/lib:./…	FALSE	Skipped as LEAN compilation failed
15	import Mathlib.Analysis.InnerProductSpace.Orthogonal import Mathlib.Analysis.Normed.Group.AddTorsor import Mathlib.Geometry.Euclidean.PerpBisector namespace myNameSpace open AffineSubspace open Set open scoped RealInnerProductSpace variable {V P : Type*} [NormedAddCommGroup V] [InnerProductSpace ℝ V] [MetricSpace P] variable [NormedAddTorsor V P] variable [NormedAddTorsor V P] variable {c c₁ c₂ p…	TRUE		TRUE	{"tactics": [{"tactic": "simp [mem_perpBisector_iff_inner_eq_zero]", "proofState": 0, "pos": {"line": 18, "column": 2}, "goals": "V : Type u_1\nP : Type u_2\ninst✝⁴ : NormedAddCommGroup V\ninst✝³ : InnerProductSpace ℝ V\ninst✝² : MetricSpace P\ninst✝¹ inst✝ : NormedAddTorsor V P\np₁ p₂ : P\n⊢ midpoint ℝ p₁ p₂ ∈ perpBisector p₁ p₂", "endPos": {"line": 18, "column": 43}}], "messages": [{"severity":…
16	import Mathlib.CategoryTheory.Comma.Over import Mathlib.Tactic.CategoryTheory.Elementwise import Mathlib.CategoryTheory.Comma.Presheaf namespace myNameSpace open CategoryTheory open OverPresheafAux open Category Opposite variable {C : Type u} [Category.{v} C] {A : Cᵒᵖ ⥤ Type v} variable {F : (CostructuredArrow yoneda A)ᵒᵖ ⥤ Type v} {X : C} theorem CategoryTheory.OverPresheafAux.app_unitForward {F…	TRUE		TRUE	{"tactics": [{"tactic": "simpa [unitForward] using p.snd.app_val", "proofState": 0, "pos": {"line": 17, "column": 2}, "goals": "C : Type u\ninst✝ : Category.{v, u} C\nA F : Cᵒᵖ ⥤ Type v\nη : F ⟶ A\nX : Cᵒᵖ\np : YonedaCollection (restrictedYonedaObj η) (unop X)\n⊢ η.app X (unitForward η (unop X) p) = p.yonedaEquivFst", "endPos": {"line": 17, "column": 41}}], "env": 0}
17	import Mathlib.CategoryTheory.Comma.Over import Mathlib.Tactic.CategoryTheory.Elementwise import Mathlib.CategoryTheory.Comma.Presheaf namespace myNameSpace open CategoryTheory open OverPresheafAux open Category Opposite variable {C : Type u} [Category.{v} C] {A : Cᵒᵖ ⥤ Type v} variable {F : (CostructuredArrow yoneda A)ᵒᵖ ⥤ Type v} {X : C} theorem CategoryTheory.OverPresheafAux.unitForward_natura…	TRUE		TRUE	{"tactics": [{"tactic": "simp [unitForward]", "proofState": 0, "pos": {"line": 18, "column": 2}, "goals": "C : Type u\ninst✝ : Category.{v, u} C\nA F : Cᵒᵖ ⥤ Type v\nη : F ⟶ A\nX Y : C\nf : X ⟶ Y\np : YonedaCollection (restrictedYonedaObj η) Y\n⊢ unitForward η X (YonedaCollection.map₂ (restrictedYonedaObj η) f p) = F.map f.op (unitForward η Y p)", "endPos": {"line": 18, "column": 20}}], "env": 0}
18	import Mathlib.CategoryTheory.Monoidal.OfChosenFiniteProducts.Symmetric import Mathlib.CategoryTheory.Limits.Constructions.FiniteProductsOfBinaryProducts import Mathlib.CategoryTheory.ChosenFiniteProducts namespace myNameSpace open CategoryTheory open ChosenFiniteProducts variable {C : Type u} [Category.{v} C] [ChosenFiniteProducts C] open MonoidalCategory theorem CategoryTheory.ChosenFiniteProdu…	TRUE		TRUE	{"tactics": [{"tactic": "erw [lift_fst_assoc, lift_fst]", "proofState": 0, "pos": {"line": 15, "column": 2}, "goals": "C : Type u\ninst✝¹ : Category.{v, u} C\ninst✝ : ChosenFiniteProducts C\nX Y Z : C\n⊢ (α_ X Y Z).inv ≫ fst (X ⊗ Y) Z ≫ fst X Y = fst X (Y ⊗ Z)", "endPos": {"line": 15, "column": 32}}, {"tactic": "rfl", "proofState": 1, "pos": {"line": 16, "column": 2}, "goals": "C : Type u\ninst✝¹…
19	import Mathlib.CategoryTheory.Comma.Over import Mathlib.Tactic.CategoryTheory.Elementwise import Mathlib.CategoryTheory.Comma.Presheaf namespace myNameSpace open CategoryTheory open OverPresheafAux open YonedaCollection open Category Opposite variable {C : Type u} [Category.{v} C] {A : Cᵒᵖ ⥤ Type v} variable {F : (CostructuredArrow yoneda A)ᵒᵖ ⥤ Type v} {X : C} theorem CategoryTheory.OverPresheaf…	TRUE		TRUE	{"tactics": [{"tactic": "simp only [YonedaCollection.yonedaEquivFst_eq, map₁_fst]", "proofState": 0, "pos": {"line": 18, "column": 2}, "goals": "C : Type u\ninst✝ : Category.{v, u} C\nA : Cᵒᵖ ⥤ Type v\nF : (CostructuredArrow yoneda A)ᵒᵖ ⥤ Type v\nX : C\nG : (CostructuredArrow yoneda A)ᵒᵖ ⥤ Type v\nη : F ⟶ G\np : YonedaCollection F X\n⊢ (map₁ η p).yonedaEquivFst = p.yonedaEquivFst", "endPos": {"li…
20	import Mathlib.CategoryTheory.Comma.Over import Mathlib.Tactic.CategoryTheory.Elementwise import Mathlib.CategoryTheory.Comma.Presheaf namespace myNameSpace open CategoryTheory open OverPresheafAux open YonedaCollection open Category Opposite variable {C : Type u} [Category.{v} C] {A : Cᵒᵖ ⥤ Type v} variable {F : (CostructuredArrow yoneda A)ᵒᵖ ⥤ Type v} {X : C} theorem CategoryTheory.OverPresheaf…	TRUE		TRUE	{"tactics": [{"tactic": "simp [map₂]", "proofState": 0, "pos": {"line": 17, "column": 2}, "goals": "C : Type u\ninst✝ : Category.{v, u} C\nA : Cᵒᵖ ⥤ Type v\nF : (CostructuredArrow yoneda A)ᵒᵖ ⥤ Type v\nX Y : C\nf : X ⟶ Y\np : YonedaCollection F Y\n⊢ (map₂ F f p).fst = yoneda.map f ≫ p.fst", "endPos": {"line": 17, "column": 13}}], "env": 0}
21	import Mathlib.CategoryTheory.Comma.Over import Mathlib.Tactic.CategoryTheory.Elementwise import Mathlib.CategoryTheory.Comma.Presheaf namespace myNameSpace open CategoryTheory open OverPresheafAux open YonedaCollection open Category Opposite variable {C : Type u} [Category.{v} C] {A : Cᵒᵖ ⥤ Type v} variable {F : (CostructuredArrow yoneda A)ᵒᵖ ⥤ Type v} {X : C} theorem CategoryTheory.OverPresheaf…	TRUE		TRUE	{"tactics": [{"tactic": "rw [YonedaCollection.map₂_fst f]", "proofState": 0, "pos": {"line": 17, "column": 18}, "goals": "C : Type u\ninst✝ : Category.{v, u} C\nA : Cᵒᵖ ⥤ Type v\nF : (CostructuredArrow yoneda A)ᵒᵖ ⥤ Type v\nX Y : C\nf : X ⟶ Y\np : YonedaCollection F Y\n⊢ op (CostructuredArrow.mk (yoneda.map f ≫ p.fst)) = op (CostructuredArrow.mk (map₂ F f p).fst)", "endPos": {"line": 17, "column"…
22	import Mathlib.CategoryTheory.Monoidal.OfChosenFiniteProducts.Symmetric import Mathlib.CategoryTheory.Limits.Constructions.FiniteProductsOfBinaryProducts import Mathlib.CategoryTheory.ChosenFiniteProducts namespace myNameSpace open CategoryTheory open ChosenFiniteProducts variable {C : Type u} [Category.{v} C] [ChosenFiniteProducts C] open MonoidalCategory theorem CategoryTheory.ChosenFiniteProdu…	TRUE		TRUE	{"tactics": [{"tactic": "erw [lift_snd_assoc, lift_fst]", "proofState": 0, "pos": {"line": 15, "column": 2}, "goals": "C : Type u\ninst✝¹ : Category.{v, u} C\ninst✝ : ChosenFiniteProducts C\nX Y Z : C\n⊢ (α_ X Y Z).hom ≫ snd X (Y ⊗ Z) ≫ fst Y Z = fst (X ⊗ Y) Z ≫ snd X Y", "endPos": {"line": 15, "column": 32}}, {"tactic": "rfl", "proofState": 1, "pos": {"line": 16, "column": 2}, "goals": "C : Type…
23	import Mathlib.Logic.Equiv.Set import Mathlib.Order.RelIso.Set import Mathlib.Order.WellFounded import Mathlib.Order.InitialSeg namespace myNameSpace open InitialSeg variable {α : Type*} {β : Type*} {γ : Type*} {r : α → α → Prop} {s : β → β → Prop} {t : γ → γ → Prop} open Function theorem InitialSeg.leLT_apply [IsWellOrder β s] [IsTrans γ t] (f : r ≼i s) (g : s ≺i t) (a : α) : (f.leLT g) a = g (f…	TRUE		TRUE	{"tactics": [{"tactic": "delta InitialSeg.leLT", "proofState": 0, "pos": {"line": 16, "column": 2}, "goals": "α : Type u_1\nβ : Type u_2\nγ : Type u_3\nr : α → α → Prop\ns : β → β → Prop\nt : γ → γ → Prop\ninst✝¹ : IsWellOrder β s\ninst✝ : IsTrans γ t\nf : r ≼i s\ng : s ≺i t\na : α\n⊢ (f.leLT g).toRelEmbedding a = g.toRelEmbedding (f a)", "endPos": {"line": 16, "column": 23}}, {"tactic": "cases' …
24	import Mathlib.Logic.Equiv.Set import Mathlib.Order.RelIso.Set import Mathlib.Order.WellFounded import Mathlib.Order.InitialSeg namespace myNameSpace open PrincipalSeg variable {α : Type*} {β : Type*} {γ : Type*} {r : α → α → Prop} {s : β → β → Prop} {t : γ → γ → Prop} open Function theorem PrincipalSeg.irrefl {r : α → α → Prop} [IsWellOrder α r] (f : r ≺i r) : False := by have h := f.lt_top f.to…	TRUE		TRUE	{"tactics": [{"tactic": "have h := f.lt_top f.top", "proofState": 0, "pos": {"line": 15, "column": 2}, "goals": "α : Type u_1 r : α → α → Prop inst✝ : IsWellOrder α r f : r ≺i r ⊢ False", "endPos": {"line": 15, "column": 26}}, {"tactic": "rw [show f f.top = f.top from InitialSeg.eq (↑f) (InitialSeg.refl r) f.top] at h", "proofState": 1, "pos": {"line": 16, "column": 2}, "goals": "α : Type u_1 r :…
25	import Mathlib.GroupTheory.FreeGroup.Basic import Mathlib.GroupTheory.FreeGroup.IsFreeGroup namespace myNameSpace open FreeGroupBasis open Function Set variable {ι ι' G H : Type*} [Group G] [Group H] theorem FreeGroupBasis.repr_apply_coe (b : FreeGroupBasis ι G) (i : ι) : b.repr (b i) = FreeGroup.of i := by change b.repr (b.repr.symm (FreeGroup.of i)) = FreeGroup.of i simp end myNameSpace	TRUE		TRUE	{"tactics": [{"tactic": "change b.repr (b.repr.symm (FreeGroup.of i)) = FreeGroup.of i", "proofState": 0, "pos": {"line": 12, "column": 2}, "goals": "ι : Type u_1 G : Type u_3 inst✝ : Group G b : FreeGroupBasis ι G i : ι ⊢ b.repr (b i) = FreeGroup.of i", "endPos": {"line": 12, "column": 63}}, {"tactic": "simp", "proofState": 1, "pos": {"line": 13, "column": 2}, "goals": "ι : Type u_1\nG : Type u_…
26	import Mathlib.Analysis.InnerProductSpace.Orthogonal import Mathlib.Analysis.Normed.Group.AddTorsor import Mathlib.Geometry.Euclidean.PerpBisector namespace myNameSpace open AffineSubspace open Set open scoped RealInnerProductSpace variable {V P : Type*} [NormedAddCommGroup V] [InnerProductSpace ℝ V] [MetricSpace P] variable [NormedAddTorsor V P] variable [NormedAddTorsor V P] variable {c c₁ c₂ p…	TRUE		TRUE	{"tactics": [{"tactic": "rw [perpBisector_comm, right_mem_perpBisector, eq_comm]", "proofState": 0, "pos": {"line": 17, "column": 2}, "goals": "V : Type u_1\nP : Type u_2\ninst✝⁴ : NormedAddCommGroup V\ninst✝³ : InnerProductSpace ℝ V\ninst✝² : MetricSpace P\ninst✝¹ inst✝ : NormedAddTorsor V P\np₁ p₂ : P\n⊢ p₁ ∈ perpBisector p₁ p₂ ↔ p₁ = p₂", "endPos": {"line": 17, "column": 57}}], "messages": [{"…
27	import Mathlib.MeasureTheory.Decomposition.RadonNikodym import Mathlib.MeasureTheory.Measure.Tilted namespace myNameSpace open MeasureTheory open Real open scoped ENNReal NNReal variable {α : Type*} {mα : MeasurableSpace α} {μ : Measure α} {f : α → ℝ} theorem MeasureTheory.tilted_zero' (μ : Measure α) : μ.tilted 0 = (μ Set.univ)⁻¹ • μ := by change μ.tilted (fun _ ↦ 0) = (μ Set.univ)⁻¹ • μ simp en…	TRUE		TRUE	{"tactics": [{"tactic": "change μ.tilted (fun _ ↦ 0) = (μ Set.univ)⁻¹ • μ", "proofState": 0, "pos": {"line": 13, "column": 2}, "goals": "α : Type u_1 mα : MeasurableSpace α μ : Measure α ⊢ μ.tilted 0 = (μ Set.univ)⁻¹ • μ", "endPos": {"line": 13, "column": 50}}, {"tactic": "simp", "proofState": 1, "pos": {"line": 14, "column": 2}, "goals": "α : Type u_1 mα : MeasurableSpace α μ : Measure α ⊢ (μ.ti…
28	import Mathlib.MeasureTheory.Decomposition.RadonNikodym import Mathlib.MeasureTheory.Measure.Tilted namespace myNameSpace open MeasureTheory open Real open scoped ENNReal NNReal variable {α : Type*} {mα : MeasurableSpace α} {μ : Measure α} {f : α → ℝ} theorem MeasureTheory.tilted_apply' (μ : Measure α) (f : α → ℝ) {s : Set α} (hs : MeasurableSet s) : μ.tilted f s = ∫⁻ a in s, ENNReal.ofReal (exp …	TRUE		TRUE	{"tactics": [{"tactic": "rw [Measure.tilted, withDensity_apply _ hs]", "proofState": 0, "pos": {"line": 14, "column": 2}, "goals": "α : Type u_1\nmα : MeasurableSpace α\nμ : Measure α\nf : α → ℝ\ns : Set α\nhs : MeasurableSet s\n⊢ (μ.tilted f) s = ∫⁻ (a : α) in s, ENNReal.ofReal (rexp (f a) / ∫ (x : α), rexp (f x) ∂μ) ∂μ", "endPos": {"line": 14, "column": 45}}], "env": 0}
29	import Mathlib.Analysis.InnerProductSpace.Orthogonal import Mathlib.Analysis.Normed.Group.AddTorsor import Mathlib.Geometry.Euclidean.PerpBisector namespace myNameSpace open AffineSubspace open Set open scoped RealInnerProductSpace variable {V P : Type*} [NormedAddCommGroup V] [InnerProductSpace ℝ V] [MetricSpace P] variable [NormedAddTorsor V P] variable [NormedAddTorsor V P] variable {c c₁ c₂ p…	TRUE		TRUE	{"tactics": [{"tactic": "ext c", "proofState": 0, "pos": {"line": 17, "column": 2}, "goals": "V : Type u_1\nP : Type u_2\ninst✝⁴ : NormedAddCommGroup V\ninst✝³ : InnerProductSpace ℝ V\ninst✝² : MetricSpace P\ninst✝¹ inst✝ : NormedAddTorsor V P\np₁ p₂ : P\n⊢ perpBisector p₁ p₂ = perpBisector p₂ p₁", "endPos": {"line": 17, "column": 7}}, {"tactic": "simp only [mem_perpBisector_iff_dist_eq, eq_comm]…
30	import Mathlib.Analysis.InnerProductSpace.Orthogonal import Mathlib.Analysis.Normed.Group.AddTorsor import Mathlib.Geometry.Euclidean.PerpBisector namespace myNameSpace open Isometry open Set open scoped RealInnerProductSpace variable {V P : Type*} [NormedAddCommGroup V] [InnerProductSpace ℝ V] [MetricSpace P] variable [NormedAddTorsor V P] variable [NormedAddTorsor V P] variable {c c₁ c₂ p₁ p₂ :…	TRUE		TRUE	{"tactics": [{"tactic": "ext x", "proofState": 0, "pos": {"line": 22, "column": 2}, "goals": "V : Type u_1\nP : Type u_2\ninst✝⁹ : NormedAddCommGroup V\ninst✝⁸ : InnerProductSpace ℝ V\ninst✝⁷ : MetricSpace P\ninst✝⁶ inst✝⁵ : NormedAddTorsor V P\nV' : Type u_3\nP' : Type u_4\ninst✝⁴ : NormedAddCommGroup V'\ninst✝³ : InnerProductSpace ℝ V'\ninst✝² : MetricSpace P'\ninst✝¹ inst✝ : NormedAddTorsor V'…
31	import Mathlib.MeasureTheory.Decomposition.RadonNikodym import Mathlib.MeasureTheory.Measure.Tilted namespace myNameSpace open MeasureTheory open Real open scoped ENNReal NNReal variable {α : Type*} {mα : MeasurableSpace α} {μ : Measure α} {f : α → ℝ} theorem MeasureTheory.tilted_of_not_aemeasurable (hf : ¬ AEMeasurable f μ) : μ.tilted f = 0 := by refine tilted_of_not_integrable ?_ suffices ¬ AEM…	TRUE		TRUE	{"tactics": [{"tactic": "refine tilted_of_not_integrable ?_", "proofState": 0, "pos": {"line": 13, "column": 2}, "goals": "α : Type u_1 mα : MeasurableSpace α μ : Measure α f : α → ℝ hf : ¬AEMeasurable f μ ⊢ μ.tilted f = 0", "endPos": {"line": 13, "column": 36}}, {"tactic": "suffices ¬AEMeasurable (fun x ↦ exp (f x)) μ by exact fun h ↦ this h.1.aemeasurable", "proofState": 1, "pos": {"line": 14, …
32	import Mathlib.Data.ENNReal.Operations import Mathlib.Data.ENNReal.Inv namespace myNameSpace open ENNReal open Set NNReal variable {a b c d : ℝ≥0∞} {r p q : ℝ≥0} theorem ENNReal.inv_ne_zero : a⁻¹ ≠ 0 ↔ a ≠ ∞ := by simp end myNameSpace	TRUE		TRUE	{"tactics": [{"tactic": "simp", "proofState": 0, "pos": {"line": 12, "column": 2}, "goals": "a : ℝ≥0∞ ⊢ a⁻¹ ≠ 0 ↔ a ≠ ⊤", "endPos": {"line": 12, "column": 6}}], "env": 0}
33	import Mathlib.Data.ENNReal.Operations import Mathlib.Data.ENNReal.Inv namespace myNameSpace open ENNReal open Set NNReal variable {a b c d : ℝ≥0∞} {r p q : ℝ≥0} theorem ENNReal.inv_lt_top {x : ℝ≥0∞} : x⁻¹ < ∞ ↔ 0 < x := by simp only [lt_top_iff_ne_top, inv_ne_top, pos_iff_ne_zero] end myNameSpace	TRUE		TRUE	{"tactics": [{"tactic": "simp only [lt_top_iff_ne_top, inv_ne_top, pos_iff_ne_zero]", "proofState": 0, "pos": {"line": 12, "column": 2}, "goals": "x : ℝ≥0∞ ⊢ x⁻¹ < ⊤ ↔ 0 < x", "endPos": {"line": 12, "column": 60}}], "env": 0}
34	import Mathlib.CategoryTheory.Comma.Over import Mathlib.Tactic.CategoryTheory.Elementwise import Mathlib.CategoryTheory.Comma.Presheaf namespace myNameSpace open CategoryTheory open OverPresheafAux open YonedaCollection open Category Opposite variable {C : Type u} [Category.{v} C] {A : Cᵒᵖ ⥤ Type v} variable {F : (CostructuredArrow yoneda A)ᵒᵖ ⥤ Type v} {X : C} theorem CategoryTheory.OverPresheaf…	TRUE		TRUE	{"tactics": [{"tactic": "rw [YonedaCollection.map₁_fst]", "proofState": 0, "pos": {"line": 17, "column": 25}, "goals": "C : Type u\ninst✝ : Category.{v, u} C\nA : Cᵒᵖ ⥤ Type v\nF : (CostructuredArrow yoneda A)ᵒᵖ ⥤ Type v\nX : C\nG : (CostructuredArrow yoneda A)ᵒᵖ ⥤ Type v\nη : F ⟶ G\np : YonedaCollection F X\n⊢ op (CostructuredArrow.mk p.fst) = op (CostructuredArrow.mk (map₁ η p).fst)", "endPos":…
35	import Mathlib.CategoryTheory.Comma.Over import Mathlib.Tactic.CategoryTheory.Elementwise import Mathlib.CategoryTheory.Comma.Presheaf namespace myNameSpace open CategoryTheory open OverPresheafAux open YonedaCollection open Category Opposite variable {C : Type u} [Category.{v} C] {A : Cᵒᵖ ⥤ Type v} variable {F : (CostructuredArrow yoneda A)ᵒᵖ ⥤ Type v} {X : C} theorem CategoryTheory.OverPresheaf…	TRUE		TRUE	{"tactics": [{"tactic": "simp [map₁]", "proofState": 0, "pos": {"line": 17, "column": 2}, "goals": "C : Type u\ninst✝ : Category.{v, u} C\nA : Cᵒᵖ ⥤ Type v\nF : (CostructuredArrow yoneda A)ᵒᵖ ⥤ Type v\nX : C\nG : (CostructuredArrow yoneda A)ᵒᵖ ⥤ Type v\nη : F ⟶ G\np : YonedaCollection F X\n⊢ (map₁ η p).fst = p.fst", "endPos": {"line": 17, "column": 13}}], "env": 0}
36	import Mathlib.CategoryTheory.Comma.Over import Mathlib.Tactic.CategoryTheory.Elementwise import Mathlib.CategoryTheory.Comma.Presheaf namespace myNameSpace open CategoryTheory open OverPresheafAux open Category Opposite variable {C : Type u} [Category.{v} C] {A : Cᵒᵖ ⥤ Type v} variable {F : (CostructuredArrow yoneda A)ᵒᵖ ⥤ Type v} {X : C} theorem CategoryTheory.OverPresheafAux.unitForward_natura…	TRUE		TRUE	{"tactics": [{"tactic": "simp [unitForward]", "proofState": 0, "pos": {"line": 17, "column": 2}, "goals": "C : Type u\ninst✝ : Category.{v, u} C\nA F G : Cᵒᵖ ⥤ Type v\nη : F ⟶ A\nμ : G ⟶ A\nε : F ⟶ G\nhε : ε ≫ μ = η\nX : C\np : YonedaCollection (restrictedYonedaObj η) X\n⊢ unitForward μ X (YonedaCollection.map₁ (restrictedYonedaObjMap₁ ε hε) p) = ε.app (op X) (unitForward η X p)", "endPos": {"lin…
37	import Mathlib.CategoryTheory.Comma.Over import Mathlib.Tactic.CategoryTheory.Elementwise import Mathlib.CategoryTheory.Comma.Presheaf namespace myNameSpace open CategoryTheory open OverPresheafAux open Category Opposite variable {C : Type u} [Category.{v} C] {A : Cᵒᵖ ⥤ Type v} theorem CategoryTheory.OverPresheafAux.map_mkPrecomp_eqToHom {F : (CostructuredArrow yoneda A)ᵒᵖ ⥤ Type v} {X Y : C} {f …	TRUE		TRUE	{"tactics": [{"tactic": "rw [h]", "proofState": 0, "pos": {"line": 15, "column": 67}, "goals": "C : Type u\ninst✝ : Category.{v, u} C\nA : Cᵒᵖ ⥤ Type v\nF : (CostructuredArrow yoneda A)ᵒᵖ ⥤ Type v\nX Y : C\nf : X ⟶ Y\ng g' : yoneda.obj Y ⟶ A\nh : g = g'\nx : F.obj (op (CostructuredArrow.mk g'))\n⊢ op (CostructuredArrow.mk g') = op (CostructuredArrow.mk g)", "endPos": {"line": 15, "column": 73}}, …
38	namespace myNameSpace Unable to analyze theorem CategoryTheory.OverPresheafAux.YonedaCollection.map₂_comp {Y Z : C} (f : X ⟶ Y) (g : Y ⟶ Z) : YonedaCollection.map₂ F (f ≫ g) = YonedaCollection.map₂ F f ∘ YonedaCollection.map₂ F g := by ext; all_goals simp end myNameSpace	FALSE	✖ [11/13] Building TmpProjDir.Basic trace: .> LEAN_PATH=././.lake/packages/batteries/.lake/build/lib:././.lake/packages/Qq/.lake/build/lib:././.lake/packages/aesop/.lake/build/lib:././.lake/packages/proofwidgets/.lake/build/lib:././.lake/packages/Cli/.lake/build/lib:././.lake/packages/importGraph/.lake/build/lib:././.lake/packages/mathlib/.lake/build/lib:././.lake/packages/REPL/.lake/build/lib:./…	FALSE	Skipped as LEAN compilation failed
39	namespace myNameSpace Unable to analyze theorem CategoryTheory.OverPresheafAux.YonedaCollection.map₁_map₂ {G : (CostructuredArrow yoneda A)ᵒᵖ ⥤ Type v} (η : F ⟶ G) {Y : C} (f : X ⟶ Y) (p : YonedaCollection F Y) : YonedaCollection.map₂ G f (YonedaCollection.map₁ η p) = YonedaCollection.map₁ η (YonedaCollection.map₂ F f p) := by ext; all_goals simp end myNameSpace	FALSE	✖ [11/13] Building TmpProjDir.Basic trace: .> LEAN_PATH=././.lake/packages/batteries/.lake/build/lib:././.lake/packages/Qq/.lake/build/lib:././.lake/packages/aesop/.lake/build/lib:././.lake/packages/proofwidgets/.lake/build/lib:././.lake/packages/Cli/.lake/build/lib:././.lake/packages/importGraph/.lake/build/lib:././.lake/packages/mathlib/.lake/build/lib:././.lake/packages/REPL/.lake/build/lib:./…	FALSE	Skipped as LEAN compilation failed
40	import Mathlib.CategoryTheory.Comma.Over import Mathlib.Tactic.CategoryTheory.Elementwise import Mathlib.CategoryTheory.Comma.Presheaf namespace myNameSpace open CategoryTheory open OverPresheafAux open OverArrows open Category Opposite variable {C : Type u} [Category.{v} C] {A : Cᵒᵖ ⥤ Type v} variable {F : (CostructuredArrow yoneda A)ᵒᵖ ⥤ Type v} {X : C} variable {F : (CostructuredArrow yoneda A…	TRUE		TRUE	{"tactics": [{"tactic": "simpa [YonedaCollection.yonedaEquivFst_eq] using p.app_val", "proofState": 0, "pos": {"line": 18, "column": 2}, "goals": "C : Type u\ninst✝ : Category.{v, u} C\nA : Cᵒᵖ ⥤ Type v\nF : (CostructuredArrow yoneda A)ᵒᵖ ⥤ Type v\nX : C\ns : yoneda.obj X ⟶ A\np : OverArrows (yonedaCollectionPresheafToA F) s\n⊢ YonedaCollection.fst p.val = s", "endPos": {"line": 18, "column": 60}…
41	import Mathlib.CategoryTheory.Comma.Over import Mathlib.Tactic.CategoryTheory.Elementwise import Mathlib.CategoryTheory.Comma.Presheaf namespace myNameSpace open CategoryTheory open OverPresheafAux open YonedaCollection open Category Opposite variable {C : Type u} [Category.{v} C] {A : Cᵒᵖ ⥤ Type v} variable {F : (CostructuredArrow yoneda A)ᵒᵖ ⥤ Type v} {X : C} theorem CategoryTheory.OverPresheaf…	TRUE		TRUE	{"tactics": [{"tactic": "simp only [YonedaCollection.yonedaEquivFst_eq, map₂_fst, yonedaEquiv_naturality]", "proofState": 0, "pos": {"line": 17, "column": 2}, "goals": "C : Type u\ninst✝ : Category.{v, u} C\nA : Cᵒᵖ ⥤ Type v\nF : (CostructuredArrow yoneda A)ᵒᵖ ⥤ Type v\nX Y : C\nf : X ⟶ Y\np : YonedaCollection F Y\n⊢ (map₂ F f p).yonedaEquivFst = A.map f.op p.yonedaEquivFst", "endPos": {"line": 1…
42	import Mathlib.Data.ENNReal.Operations import Mathlib.Data.ENNReal.Inv namespace myNameSpace open ENNReal open Set NNReal variable {a b c d : ℝ≥0∞} {r p q : ℝ≥0} theorem ENNReal.inv_mul_le_iff {x y z : ℝ≥0∞} (h1 : x ≠ 0) (h2 : x ≠ ∞) : x⁻¹ * y ≤ z ↔ y ≤ x * z := by rw [← mul_le_mul_left h1 h2, ← mul_assoc, ENNReal.mul_inv_cancel h1 h2, one_mul] end myNameSpace	TRUE		TRUE	{"tactics": [{"tactic": "rw [← mul_le_mul_left h1 h2, ← mul_assoc, ENNReal.mul_inv_cancel h1 h2, one_mul]", "proofState": 0, "pos": {"line": 13, "column": 2}, "goals": "x y z : ℝ≥0∞ h1 : x ≠ 0 h2 : x ≠ ⊤ ⊢ x⁻¹ * y ≤ z ↔ y ≤ x * z", "endPos": {"line": 13, "column": 82}}], "env": 0}
43	namespace myNameSpace Unable to analyze theorem CategoryTheory.OverPresheafAux.YonedaCollection.map₁_comp {G H : (CostructuredArrow yoneda A)ᵒᵖ ⥤ Type v} (η : F ⟶ G) (μ : G ⟶ H) : YonedaCollection.map₁ (η ≫ μ) (X := X) = YonedaCollection.map₁ μ (X := X) ∘ YonedaCollection.map₁ η (X := X) := by ext; all_goals simp end myNameSpace	FALSE	✖ [11/13] Building TmpProjDir.Basic trace: .> LEAN_PATH=././.lake/packages/batteries/.lake/build/lib:././.lake/packages/Qq/.lake/build/lib:././.lake/packages/aesop/.lake/build/lib:././.lake/packages/proofwidgets/.lake/build/lib:././.lake/packages/Cli/.lake/build/lib:././.lake/packages/importGraph/.lake/build/lib:././.lake/packages/mathlib/.lake/build/lib:././.lake/packages/REPL/.lake/build/lib:./…	FALSE	Skipped as LEAN compilation failed
44	namespace myNameSpace Unable to analyze theorem IsFreeGroup.unique_lift (f : Generators G → H) : ∃! F : G →* H, ∀ a, F (of a) = f a := by simpa only [Function.funext_iff] using lift.symm.bijective.existsUnique f end myNameSpace	FALSE	✖ [11/13] Building TmpProjDir.Basic trace: .> LEAN_PATH=././.lake/packages/batteries/.lake/build/lib:././.lake/packages/Qq/.lake/build/lib:././.lake/packages/aesop/.lake/build/lib:././.lake/packages/proofwidgets/.lake/build/lib:././.lake/packages/Cli/.lake/build/lib:././.lake/packages/importGraph/.lake/build/lib:././.lake/packages/mathlib/.lake/build/lib:././.lake/packages/REPL/.lake/build/lib:./…	FALSE	Skipped as LEAN compilation failed
45	import Mathlib.Data.ENNReal.Operations import Mathlib.Data.ENNReal.Inv namespace myNameSpace open ENNReal open Set NNReal variable {a b c d : ℝ≥0∞} {r p q : ℝ≥0} theorem ENNReal.mul_inv_le_iff {x y z : ℝ≥0∞} (h1 : y ≠ 0) (h2 : y ≠ ∞) : x * y⁻¹ ≤ z ↔ x ≤ z * y := by rw [mul_comm, ENNReal.inv_mul_le_iff h1 h2, mul_comm] end myNameSpace	TRUE		TRUE	{"tactics": [{"tactic": "rw [mul_comm, ENNReal.inv_mul_le_iff h1 h2, mul_comm]", "proofState": 0, "pos": {"line": 13, "column": 2}, "goals": "x y z : ℝ≥0∞ h1 : y ≠ 0 h2 : y ≠ ⊤ ⊢ x * y⁻¹ ≤ z ↔ x ≤ z * y", "endPos": {"line": 13, "column": 55}}], "env": 0}
46	import Mathlib.Data.ENNReal.Operations import Mathlib.Data.ENNReal.Inv namespace myNameSpace open ENNReal open Set NNReal variable {a b c d : ℝ≥0∞} {r p q : ℝ≥0} theorem ENNReal.div_le_iff' {x y z : ℝ≥0∞} (h1 : y ≠ 0) (h2 : y ≠ ∞) : x / y ≤ z ↔ x ≤ y * z := by rw [mul_comm, ENNReal.div_le_iff h1 h2] end myNameSpace	TRUE		TRUE	{"tactics": [{"tactic": "rw [mul_comm, ENNReal.div_le_iff h1 h2]", "proofState": 0, "pos": {"line": 13, "column": 2}, "goals": "x y z : ℝ≥0∞ h1 : y ≠ 0 h2 : y ≠ ⊤ ⊢ x / y ≤ z ↔ x ≤ y * z", "endPos": {"line": 13, "column": 41}}], "env": 0}
47	import Mathlib.MeasureTheory.Decomposition.RadonNikodym import Mathlib.MeasureTheory.Measure.Tilted namespace myNameSpace open MeasureTheory open Real open scoped ENNReal NNReal variable {α : Type*} {mα : MeasurableSpace α} {μ : Measure α} {f : α → ℝ} theorem MeasureTheory.tilted_zero_measure (f : α → ℝ) : (0 : Measure α).tilted f = 0 := by simp [Measure.tilted] end myNameSpace	TRUE		TRUE	{"tactics": [{"tactic": "simp [Measure.tilted]", "proofState": 0, "pos": {"line": 13, "column": 2}, "goals": "α : Type u_1 mα : MeasurableSpace α f : α → ℝ ⊢ Measure.tilted 0 f = 0", "endPos": {"line": 13, "column": 23}}], "env": 0}
48	import Mathlib.CategoryTheory.Comma.Over import Mathlib.Tactic.CategoryTheory.Elementwise import Mathlib.CategoryTheory.Comma.Presheaf namespace myNameSpace open CategoryTheory open OverPresheafAux open YonedaCollection open Category Opposite variable {C : Type u} [Category.{v} C] {A : Cᵒᵖ ⥤ Type v} variable {F : (CostructuredArrow yoneda A)ᵒᵖ ⥤ Type v} {X : C} theorem CategoryTheory.OverPresheaf…	TRUE		TRUE	{"tactics": [{"tactic": "rw [h]", "proofState": 0, "pos": {"line": 16, "column": 31}, "goals": "C : Type u\ninst✝ : Category.{v, u} C\nA : Cᵒᵖ ⥤ Type v\nF : (CostructuredArrow yoneda A)ᵒᵖ ⥤ Type v\nX : C\np q : YonedaCollection F X\nh : p.fst = q.fst\n⊢ op (CostructuredArrow.mk q.fst) = op (CostructuredArrow.mk p.fst)", "endPos": {"line": 16, "column": 37}}, {"tactic": "rcases p with ⟨p, p'⟩", "p…
49	import Mathlib.Data.ENNReal.Operations import Mathlib.Data.ENNReal.Inv namespace myNameSpace open ENNReal open Set NNReal variable {a b c d : ℝ≥0∞} {r p q : ℝ≥0} theorem ENNReal.div_le_iff {x y z : ℝ≥0∞} (h1 : y ≠ 0) (h2 : y ≠ ∞) : x / y ≤ z ↔ x ≤ z * y := by rw [div_eq_mul_inv, ENNReal.mul_inv_le_iff h1 h2] end myNameSpace	TRUE		TRUE	{"tactics": [{"tactic": "rw [div_eq_mul_inv, ENNReal.mul_inv_le_iff h1 h2]", "proofState": 0, "pos": {"line": 13, "column": 2}, "goals": "x y z : ℝ≥0∞ h1 : y ≠ 0 h2 : y ≠ ⊤ ⊢ x / y ≤ z ↔ x ≤ z * y", "endPos": {"line": 13, "column": 51}}], "env": 0}
50	import Mathlib.MeasureTheory.Decomposition.RadonNikodym import Mathlib.MeasureTheory.Measure.Tilted namespace myNameSpace open MeasureTheory open Real open scoped ENNReal NNReal variable {α : Type*} {mα : MeasurableSpace α} {μ : Measure α} {f : α → ℝ} theorem MeasureTheory.tilted_of_not_integrable (hf : ¬ Integrable (fun x ↦ exp (f x)) μ) : μ.tilted f = 0 := by rw [Measure.tilted, integral_undef …	TRUE		TRUE	{"tactics": [{"tactic": "rw [Measure.tilted, integral_undef hf]", "proofState": 0, "pos": {"line": 13, "column": 2}, "goals": "α : Type u_1 mα : MeasurableSpace α μ : Measure α f : α → ℝ hf : ¬Integrable (fun x => rexp (f x)) μ ⊢ μ.tilted f = 0", "endPos": {"line": 13, "column": 40}}, {"tactic": "simp", "proofState": 1, "pos": {"line": 14, "column": 2}, "goals": "α : Type u_1\nmα : MeasurableSpac…
51	import Mathlib.MeasureTheory.Decomposition.RadonNikodym import Mathlib.MeasureTheory.Measure.Tilted namespace myNameSpace open MeasureTheory open Real open scoped ENNReal NNReal variable {α : Type*} {mα : MeasurableSpace α} {μ : Measure α} {f : α → ℝ} theorem MeasureTheory.tilted_zero (μ : Measure α) [IsProbabilityMeasure μ] : μ.tilted 0 = μ := by simp end myNameSpace	TRUE		TRUE	{"tactics": [{"tactic": "simp", "proofState": 0, "pos": {"line": 13, "column": 2}, "goals": "α : Type u_1 mα : MeasurableSpace α μ : Measure α inst✝ : IsProbabilityMeasure μ ⊢ μ.tilted 0 = μ", "endPos": {"line": 13, "column": 6}}], "env": 0}
52	import Mathlib.CategoryTheory.Comma.Over import Mathlib.Tactic.CategoryTheory.Elementwise import Mathlib.CategoryTheory.Comma.Presheaf namespace myNameSpace open CategoryTheory open OverPresheafAux open Category Opposite variable {C : Type u} [Category.{v} C] {A : Cᵒᵖ ⥤ Type v} variable {F : (CostructuredArrow yoneda A)ᵒᵖ ⥤ Type v} {X : C} theorem CategoryTheory.OverPresheafAux.unitBackward_unitF…	TRUE		TRUE	{"tactics": [{"tactic": "refine funext fun p => YonedaCollection.ext ?_ (OverArrows.ext ?_)", "proofState": 0, "pos": {"line": 16, "column": 2}, "goals": "C : Type u inst✝ : Category.{v, u} C A F : Cᵒᵖ ⥤ Type v η : F ⟶ A X : C ⊢ unitBackward η X ∘ unitForward η X = id", "endPos": {"line": 16, "column": 68}}, {"tactic": "simpa [unitForward, unitBackward] using congrArg yonedaEquiv.symm p.snd.app_v…
53	import Mathlib.MeasureTheory.Decomposition.RadonNikodym import Mathlib.MeasureTheory.Measure.Tilted namespace myNameSpace open MeasureTheory open Real open scoped ENNReal NNReal variable {α : Type*} {mα : MeasurableSpace α} {μ : Measure α} {f : α → ℝ} theorem MeasureTheory.tilted_const (μ : Measure α) [IsProbabilityMeasure μ] (c : ℝ) : μ.tilted (fun _ ↦ c) = μ := by simp end myNameSpace	TRUE		TRUE	{"tactics": [{"tactic": "simp", "proofState": 0, "pos": {"line": 14, "column": 2}, "goals": "α : Type u_1 mα : MeasurableSpace α μ : Measure α inst✝ : IsProbabilityMeasure μ c : ℝ ⊢ (μ.tilted fun x => c) = μ", "endPos": {"line": 14, "column": 6}}], "env": 0}
54	namespace myNameSpace Unable to analyze theorem MulAction.IsFixedBlock.isBlock {B : Set X} (hfB : IsFixedBlock G B) : IsBlock G B := by simp [IsBlock.def, hfB _] end myNameSpace	FALSE	✖ [11/13] Building TmpProjDir.Basic trace: .> LEAN_PATH=././.lake/packages/batteries/.lake/build/lib:././.lake/packages/Qq/.lake/build/lib:././.lake/packages/aesop/.lake/build/lib:././.lake/packages/proofwidgets/.lake/build/lib:././.lake/packages/Cli/.lake/build/lib:././.lake/packages/importGraph/.lake/build/lib:././.lake/packages/mathlib/.lake/build/lib:././.lake/packages/REPL/.lake/build/lib:./…	FALSE	Skipped as LEAN compilation failed
55	namespace myNameSpace Unable to analyze theorem MulAction.IsBlock.def {B : Set X} : IsBlock G B ↔ ∀ g g' : G, g • B = g' • B ∨ Disjoint (g • B) (g' • B) := by apply Set.pairwiseDisjoint_range_iff end myNameSpace	FALSE	✖ [11/13] Building TmpProjDir.Basic trace: .> LEAN_PATH=././.lake/packages/batteries/.lake/build/lib:././.lake/packages/Qq/.lake/build/lib:././.lake/packages/aesop/.lake/build/lib:././.lake/packages/proofwidgets/.lake/build/lib:././.lake/packages/Cli/.lake/build/lib:././.lake/packages/importGraph/.lake/build/lib:././.lake/packages/mathlib/.lake/build/lib:././.lake/packages/REPL/.lake/build/lib:./…	FALSE	Skipped as LEAN compilation failed
56	namespace myNameSpace Unable to analyze theorem MulAction.IsBlock.mk_notempty {B : Set X} : IsBlock G B ↔ ∀ g g' : G, g • B ∩ g' • B ≠ ∅ → g • B = g' • B := by simp_rw [IsBlock.def, or_iff_not_imp_right, Set.disjoint_iff_inter_eq_empty] end myNameSpace	FALSE	✖ [11/13] Building TmpProjDir.Basic trace: .> LEAN_PATH=././.lake/packages/batteries/.lake/build/lib:././.lake/packages/Qq/.lake/build/lib:././.lake/packages/aesop/.lake/build/lib:././.lake/packages/proofwidgets/.lake/build/lib:././.lake/packages/Cli/.lake/build/lib:././.lake/packages/importGraph/.lake/build/lib:././.lake/packages/mathlib/.lake/build/lib:././.lake/packages/REPL/.lake/build/lib:./…	FALSE	Skipped as LEAN compilation failed
57	namespace myNameSpace Unable to analyze theorem MulAction.isBlock_empty : IsBlock G (⊥ : Set X) := by simp [IsBlock.def, Set.bot_eq_empty, Set.smul_set_empty] end myNameSpace	FALSE	✖ [11/13] Building TmpProjDir.Basic trace: .> LEAN_PATH=././.lake/packages/batteries/.lake/build/lib:././.lake/packages/Qq/.lake/build/lib:././.lake/packages/aesop/.lake/build/lib:././.lake/packages/proofwidgets/.lake/build/lib:././.lake/packages/Cli/.lake/build/lib:././.lake/packages/importGraph/.lake/build/lib:././.lake/packages/mathlib/.lake/build/lib:././.lake/packages/REPL/.lake/build/lib:./…	FALSE	Skipped as LEAN compilation failed
58	namespace myNameSpace Unable to analyze theorem MulAction.IsBlock.mk_notempty_one {B : Set X} : IsBlock G B ↔ ∀ g : G, g • B ∩ B ≠ ∅ → g • B = B := by simp_rw [IsBlock.def_one, Set.disjoint_iff_inter_eq_empty, or_iff_not_imp_right] end myNameSpace	FALSE	✖ [11/13] Building TmpProjDir.Basic trace: .> LEAN_PATH=././.lake/packages/batteries/.lake/build/lib:././.lake/packages/Qq/.lake/build/lib:././.lake/packages/aesop/.lake/build/lib:././.lake/packages/proofwidgets/.lake/build/lib:././.lake/packages/Cli/.lake/build/lib:././.lake/packages/importGraph/.lake/build/lib:././.lake/packages/mathlib/.lake/build/lib:././.lake/packages/REPL/.lake/build/lib:./…	FALSE	Skipped as LEAN compilation failed
59	import Mathlib.Data.Setoid.Partition import Mathlib.GroupTheory.GroupAction.Basic import Mathlib.GroupTheory.GroupAction.Pointwise import Mathlib.GroupTheory.GroupAction.SubMulAction import Mathlib.GroupTheory.GroupAction.Blocks namespace myNameSpace open MulAction open orbit open scoped BigOperators Pointwise variable {G : Type*} [Group G] {X : Type*} [MulAction G X] theorem MulAction.orbit.pair…	TRUE		TRUE	{"tactics": [{"tactic": "rintro s ⟨x, rfl⟩ t ⟨y, rfl⟩ h", "proofState": 0, "pos": {"line": 17, "column": 2}, "goals": "G : Type u_1 inst✝¹ : Group G X : Type u_2 inst✝ : MulAction G X ⊢ (Set.range fun x => orbit G x).PairwiseDisjoint id", "endPos": {"line": 17, "column": 32}}, {"tactic": "contrapose! h", "proofState": 1, "pos": {"line": 18, "column": 2}, "goals": "case intro.intro\nG : Type u_1\n…
60	import Mathlib.Data.ENNReal.Operations import Mathlib.Data.ENNReal.Inv namespace myNameSpace open ENNReal open Set NNReal variable {a b c d : ℝ≥0∞} {r p q : ℝ≥0} theorem ENNReal.lt_inv_iff_lt_inv : a < b⁻¹ ↔ b < a⁻¹ := by simpa only [inv_inv] using @ENNReal.inv_lt_inv a⁻¹ b end myNameSpace	TRUE		TRUE	{"tactics": [{"tactic": "simpa only [inv_inv] using @ENNReal.inv_lt_inv a⁻¹ b", "proofState": 0, "pos": {"line": 12, "column": 2}, "goals": "a b : ℝ≥0∞ ⊢ a < b⁻¹ ↔ b < a⁻¹", "endPos": {"line": 12, "column": 54}}], "env": 0}
61	namespace myNameSpace Unable to analyze theorem MulAction.isBlock_singleton (a : X) : IsBlock G ({a} : Set X) := by simp [IsBlock.def, Classical.or_iff_not_imp_left] end myNameSpace	FALSE	✖ [11/13] Building TmpProjDir.Basic trace: .> LEAN_PATH=././.lake/packages/batteries/.lake/build/lib:././.lake/packages/Qq/.lake/build/lib:././.lake/packages/aesop/.lake/build/lib:././.lake/packages/proofwidgets/.lake/build/lib:././.lake/packages/Cli/.lake/build/lib:././.lake/packages/importGraph/.lake/build/lib:././.lake/packages/mathlib/.lake/build/lib:././.lake/packages/REPL/.lake/build/lib:./…	FALSE	Skipped as LEAN compilation failed
62	import Mathlib.Data.Setoid.Partition import Mathlib.GroupTheory.GroupAction.Basic import Mathlib.GroupTheory.GroupAction.Pointwise import Mathlib.GroupTheory.GroupAction.SubMulAction import Mathlib.GroupTheory.GroupAction.Blocks namespace myNameSpace open MulAction open orbit open scoped BigOperators Pointwise variable {G : Type*} [Group G] {X : Type*} [MulAction G X] theorem MulAction.orbit.eq_o…	TRUE		TRUE	{"tactics": [{"tactic": "apply (em (Disjoint (orbit G a) (orbit G b))).symm.imp _ id", "proofState": 0, "pos": {"line": 17, "column": 2}, "goals": "G : Type u_1\ninst✝¹ : Group G\nX : Type u_2\ninst✝ : MulAction G X\na b : X\n⊢ orbit G a = orbit G b ∨ Disjoint (orbit G a) (orbit G b)", "endPos": {"line": 17, "column": 61}}, {"tactic": "simp (config := { contextual := true }) only [Set.not_disjoin…
63	import Mathlib.Data.ENNReal.Operations import Mathlib.Data.ENNReal.Inv namespace myNameSpace open ENNReal open Set NNReal variable {a b c d : ℝ≥0∞} {r p q : ℝ≥0} theorem ENNReal.inv_lt_iff_inv_lt : a⁻¹ < b ↔ b⁻¹ < a := by simpa only [inv_inv] using @ENNReal.inv_lt_inv a b⁻¹ end myNameSpace	TRUE		TRUE	{"tactics": [{"tactic": "simpa only [inv_inv] using @ENNReal.inv_lt_inv a b⁻¹", "proofState": 0, "pos": {"line": 12, "column": 2}, "goals": "a b : ℝ≥0∞ ⊢ a⁻¹ < b ↔ b⁻¹ < a", "endPos": {"line": 12, "column": 54}}], "env": 0}
64	import Mathlib.Data.Setoid.Partition import Mathlib.GroupTheory.GroupAction.Basic import Mathlib.GroupTheory.GroupAction.Pointwise import Mathlib.GroupTheory.GroupAction.SubMulAction import Mathlib.GroupTheory.GroupAction.Blocks namespace myNameSpace open MulAction open IsPartition open scoped BigOperators Pointwise variable {G : Type*} [Group G] {X : Type*} [MulAction G X] theorem MulAction.IsPa…	TRUE		TRUE	{"tactics": [{"tactic": "apply orbit.pairwiseDisjoint.isPartition_of_exists_of_ne_empty", "proofState": 0, "pos": {"line": 17, "column": 2}, "goals": "G : Type u_1 inst✝¹ : Group G X : Type u_2 inst✝ : MulAction G X ⊢ Setoid.IsPartition (Set.range fun a => orbit G a)", "endPos": {"line": 17, "column": 64}}, {"tactic": "intro x", "proofState": 1, "pos": {"line": 18, "column": 4}, "goals": "case h₂…
65	import Mathlib.Data.ENNReal.Operations import Mathlib.Data.ENNReal.Inv namespace myNameSpace open ENNReal open Set NNReal variable {a b c d : ℝ≥0∞} {r p q : ℝ≥0} theorem ENNReal.top_div_of_ne_top (h : a ≠ ∞) : ∞ / a = ∞ := by simp [top_div, h] end myNameSpace	TRUE		TRUE	{"tactics": [{"tactic": "simp [top_div, h]", "proofState": 0, "pos": {"line": 12, "column": 2}, "goals": "a : ℝ≥0∞ h : a ≠ ⊤ ⊢ ⊤ / a = ⊤", "endPos": {"line": 12, "column": 19}}], "env": 0}
66	import Mathlib.Data.ENNReal.Operations import Mathlib.Data.ENNReal.Inv namespace myNameSpace open ENNReal open Set NNReal variable {a b c d : ℝ≥0∞} {r p q : ℝ≥0} theorem ENNReal.inv_le_one : a⁻¹ ≤ 1 ↔ 1 ≤ a := by rw [inv_le_iff_inv_le, inv_one] end myNameSpace	TRUE		TRUE	{"tactics": [{"tactic": "rw [inv_le_iff_inv_le, inv_one]", "proofState": 0, "pos": {"line": 12, "column": 2}, "goals": "a : ℝ≥0∞ ⊢ a⁻¹ ≤ 1 ↔ 1 ≤ a", "endPos": {"line": 12, "column": 33}}], "env": 0}
67	import Mathlib.Data.ENNReal.Operations import Mathlib.Data.ENNReal.Inv namespace myNameSpace open ENNReal open Set NNReal variable {a b c d : ℝ≥0∞} {r p q : ℝ≥0} theorem ENNReal.one_lt_inv : 1 < a⁻¹ ↔ a < 1 := by rw [lt_inv_iff_lt_inv, inv_one] end myNameSpace	TRUE		TRUE	{"tactics": [{"tactic": "rw [lt_inv_iff_lt_inv, inv_one]", "proofState": 0, "pos": {"line": 12, "column": 2}, "goals": "a : ℝ≥0∞ ⊢ 1 < a⁻¹ ↔ a < 1", "endPos": {"line": 12, "column": 33}}], "env": 0}
68	namespace myNameSpace Unable to analyze theorem MulAction.IsBlock.subgroup {H : Subgroup G} {B : Set X} (hfB : IsBlock G B) : IsBlock H B := by rw [IsBlock.def_one]; rintro ⟨g, _⟩ simpa only using hfB.smul_eq_or_disjoint g end myNameSpace	FALSE	✖ [11/13] Building TmpProjDir.Basic trace: .> LEAN_PATH=././.lake/packages/batteries/.lake/build/lib:././.lake/packages/Qq/.lake/build/lib:././.lake/packages/aesop/.lake/build/lib:././.lake/packages/proofwidgets/.lake/build/lib:././.lake/packages/Cli/.lake/build/lib:././.lake/packages/importGraph/.lake/build/lib:././.lake/packages/mathlib/.lake/build/lib:././.lake/packages/REPL/.lake/build/lib:./…	FALSE	Skipped as LEAN compilation failed
69	import Mathlib.Data.ENNReal.Operations import Mathlib.Data.ENNReal.Inv namespace myNameSpace open ENNReal open Set NNReal variable {a b c d : ℝ≥0∞} {r p q : ℝ≥0} theorem ENNReal.div_top : a / ∞ = 0 := by rw [div_eq_mul_inv, inv_top, mul_zero] end myNameSpace	TRUE		TRUE	{"tactics": [{"tactic": "rw [div_eq_mul_inv, inv_top, mul_zero]", "proofState": 0, "pos": {"line": 12, "column": 2}, "goals": "a : ℝ≥0∞ ⊢ a / ⊤ = 0", "endPos": {"line": 12, "column": 40}}], "env": 0}
70	import Mathlib.Data.ENNReal.Operations import Mathlib.Data.ENNReal.Inv namespace myNameSpace open ENNReal open Set NNReal variable {a b c d : ℝ≥0∞} {r p q : ℝ≥0} theorem ENNReal.one_le_inv : 1 ≤ a⁻¹ ↔ a ≤ 1 := by rw [le_inv_iff_le_inv, inv_one] end myNameSpace	TRUE		TRUE	{"tactics": [{"tactic": "rw [le_inv_iff_le_inv, inv_one]", "proofState": 0, "pos": {"line": 12, "column": 2}, "goals": "a : ℝ≥0∞ ⊢ 1 ≤ a⁻¹ ↔ a ≤ 1", "endPos": {"line": 12, "column": 33}}], "env": 0}
71	import Mathlib.Data.ENNReal.Operations import Mathlib.Data.ENNReal.Inv namespace myNameSpace open ENNReal open Set NNReal variable {a b c d : ℝ≥0∞} {r p q : ℝ≥0} theorem ENNReal.sub_div (h : 0 < b → b < a → c ≠ 0) : (a - b) / c = a / c - b / c := by simp_rw [div_eq_mul_inv] exact ENNReal.sub_mul (by simpa using h) end myNameSpace	TRUE		TRUE	{"tactics": [{"tactic": "simp_rw [div_eq_mul_inv]", "proofState": 0, "pos": {"line": 12, "column": 2}, "goals": "a b c : ℝ≥0∞ h : 0 < b → b < a → c ≠ 0 ⊢ (a - b) / c = a / c - b / c", "endPos": {"line": 12, "column": 26}}, {"tactic": "exact ENNReal.sub_mul (by simpa using h)", "proofState": 1, "pos": {"line": 13, "column": 2}, "goals": "a b c : ℝ≥0∞ h : 0 < b → b < a → c ≠ 0 ⊢ (a - b) * c⁻¹ = a *…
72	import Mathlib.Data.ENNReal.Operations import Mathlib.Data.ENNReal.Inv namespace myNameSpace open ENNReal open Set NNReal variable {a b c d : ℝ≥0∞} {r p q : ℝ≥0} theorem ENNReal.inv_mul_le_one (a : ℝ≥0∞) : a⁻¹ * a ≤ 1 := by simp [mul_comm] end myNameSpace	TRUE		TRUE	{"tactics": [{"tactic": "simp [mul_comm]", "proofState": 0, "pos": {"line": 12, "column": 2}, "goals": "a : ℝ≥0∞ ⊢ a⁻¹ * a ≤ 1", "endPos": {"line": 12, "column": 17}}], "env": 0}
73	namespace myNameSpace Unable to analyze theorem MulAction.IsBlock.smul_eq_or_disjoint {B : Set X} (hB : IsBlock G B) (g : G) : g • B = B ∨ Disjoint (g • B) B := by rw [IsBlock.def] at hB simpa only [one_smul] using hB g 1 end myNameSpace	FALSE	✖ [11/13] Building TmpProjDir.Basic trace: .> LEAN_PATH=././.lake/packages/batteries/.lake/build/lib:././.lake/packages/Qq/.lake/build/lib:././.lake/packages/aesop/.lake/build/lib:././.lake/packages/proofwidgets/.lake/build/lib:././.lake/packages/Cli/.lake/build/lib:././.lake/packages/importGraph/.lake/build/lib:././.lake/packages/mathlib/.lake/build/lib:././.lake/packages/REPL/.lake/build/lib:./…	FALSE	Skipped as LEAN compilation failed
74	import Mathlib.Data.ENNReal.Operations import Mathlib.Data.ENNReal.Inv namespace myNameSpace open ENNReal open Set NNReal variable {a b c d : ℝ≥0∞} {r p q : ℝ≥0} theorem ENNReal.le_inv_iff_le_inv : a ≤ b⁻¹ ↔ b ≤ a⁻¹ := by simpa only [inv_inv] using @ENNReal.inv_le_inv a⁻¹ b end myNameSpace	TRUE		TRUE	{"tactics": [{"tactic": "simpa only [inv_inv] using @ENNReal.inv_le_inv a⁻¹ b", "proofState": 0, "pos": {"line": 12, "column": 2}, "goals": "a b : ℝ≥0∞ ⊢ a ≤ b⁻¹ ↔ b ≤ a⁻¹", "endPos": {"line": 12, "column": 54}}], "env": 0}
75	import Mathlib.Data.ENNReal.Operations import Mathlib.Data.ENNReal.Inv namespace myNameSpace open ENNReal open Set NNReal variable {a b c d : ℝ≥0∞} {r p q : ℝ≥0} theorem ENNReal.mul_div_mul_right (a b : ℝ≥0∞) (hc : c ≠ 0) (hc' : c ≠ ⊤) : a * c / (b * c) = a / b := by rw [div_eq_mul_inv, div_eq_mul_inv, ENNReal.mul_inv (Or.inr hc') (Or.inr hc), mul_mul_mul_comm, ENNReal.mul_inv_cancel hc hc', mul_…	TRUE		TRUE	{"tactics": [{"tactic": "rw [div_eq_mul_inv, div_eq_mul_inv, ENNReal.mul_inv (Or.inr hc') (Or.inr hc), mul_mul_mul_comm,\n ENNReal.mul_inv_cancel hc hc', mul_one]", "proofState": 0, "pos": {"line": 13, "column": 2}, "goals": "c a b : ℝ≥0∞ hc : c ≠ 0 hc' : c ≠ ⊤ ⊢ a * c / (b * c) = a / b", "endPos": {"line": 14, "column": 43}}], "env": 0}
76	import Mathlib.Data.ENNReal.Operations import Mathlib.Data.ENNReal.Inv namespace myNameSpace open ENNReal open Set NNReal variable {a b c d : ℝ≥0∞} {r p q : ℝ≥0} theorem ENNReal.inv_lt_one : a⁻¹ < 1 ↔ 1 < a := by rw [inv_lt_iff_inv_lt, inv_one] end myNameSpace	TRUE		TRUE	{"tactics": [{"tactic": "rw [inv_lt_iff_inv_lt, inv_one]", "proofState": 0, "pos": {"line": 12, "column": 2}, "goals": "a : ℝ≥0∞ ⊢ a⁻¹ < 1 ↔ 1 < a", "endPos": {"line": 12, "column": 33}}], "env": 0}
77	import Mathlib.Data.ENNReal.Operations import Mathlib.Data.ENNReal.Inv namespace myNameSpace open ENNReal open Set NNReal variable {a b c d : ℝ≥0∞} {r p q : ℝ≥0} theorem ENNReal.inv_mul_ne_top (a : ℝ≥0∞) : a⁻¹ * a ≠ ⊤ := by simp [mul_comm] end myNameSpace	TRUE		TRUE	{"tactics": [{"tactic": "simp [mul_comm]", "proofState": 0, "pos": {"line": 12, "column": 2}, "goals": "a : ℝ≥0∞ ⊢ a⁻¹ * a ≠ ⊤", "endPos": {"line": 12, "column": 17}}], "env": 0}
78	import Mathlib.Data.ENNReal.Operations import Mathlib.Data.ENNReal.Inv namespace myNameSpace open ENNReal open Set NNReal variable {a b c d : ℝ≥0∞} {r p q : ℝ≥0} theorem ENNReal.top_div : ∞ / a = if a = ∞ then 0 else ∞ := by simp [div_eq_mul_inv, top_mul'] end myNameSpace	TRUE		TRUE	{"tactics": [{"tactic": "simp [div_eq_mul_inv, top_mul']", "proofState": 0, "pos": {"line": 12, "column": 2}, "goals": "a : ℝ≥0∞ ⊢ ⊤ / a = if a = ⊤ then 0 else ⊤", "endPos": {"line": 12, "column": 33}}], "env": 0}
79	import Mathlib.Data.ENNReal.Operations import Mathlib.Data.ENNReal.Inv namespace myNameSpace open ENNReal open Set NNReal variable {a b c d : ℝ≥0∞} {r p q : ℝ≥0} theorem ENNReal.div_pos_iff : 0 < a / b ↔ a ≠ 0 ∧ b ≠ ∞ := by simp [pos_iff_ne_zero, not_or] end myNameSpace	TRUE		TRUE	{"tactics": [{"tactic": "simp [pos_iff_ne_zero, not_or]", "proofState": 0, "pos": {"line": 12, "column": 2}, "goals": "a b : ℝ≥0∞ ⊢ 0 < a / b ↔ a ≠ 0 ∧ b ≠ ⊤", "endPos": {"line": 12, "column": 32}}], "env": 0}
80	import Mathlib.Data.ENNReal.Operations import Mathlib.Data.ENNReal.Inv namespace myNameSpace open ENNReal open Set NNReal variable {a b c d : ℝ≥0∞} {r p q : ℝ≥0} theorem ENNReal.mul_lt_of_lt_div (h : a < b / c) : a * c < b := by contrapose! h exact ENNReal.div_le_of_le_mul h end myNameSpace	TRUE		TRUE	{"tactics": [{"tactic": "contrapose! h", "proofState": 0, "pos": {"line": 12, "column": 2}, "goals": "a b c : ℝ≥0∞ h : a < b / c ⊢ a * c < b", "endPos": {"line": 12, "column": 15}}, {"tactic": "exact ENNReal.div_le_of_le_mul h", "proofState": 1, "pos": {"line": 13, "column": 2}, "goals": "a b c : ℝ≥0∞ h : b ≤ a * c ⊢ b / c ≤ a", "endPos": {"line": 13, "column": 34}}], "env": 0}
81	namespace myNameSpace Unable to analyze theorem MeasureTheory.rnDeriv_tilted_left {ν : Measure α} [SigmaFinite μ] [SigmaFinite ν] (hfν : AEMeasurable f ν) : (μ.tilted f).rnDeriv ν =ᵐ[ν] fun x ↦ ENNReal.ofReal (exp (f x) / (∫ x, exp (f x) ∂μ)) * μ.rnDeriv ν x := by let g := fun x ↦ ENNReal.ofReal (exp (f x) / (∫ x, exp (f x) ∂μ)) refine Measure.rnDeriv_withDensity_left (μ := μ) (ν := ν) (f := g) ?…	FALSE	✖ [11/13] Building TmpProjDir.Basic trace: .> LEAN_PATH=././.lake/packages/batteries/.lake/build/lib:././.lake/packages/Qq/.lake/build/lib:././.lake/packages/aesop/.lake/build/lib:././.lake/packages/proofwidgets/.lake/build/lib:././.lake/packages/Cli/.lake/build/lib:././.lake/packages/importGraph/.lake/build/lib:././.lake/packages/mathlib/.lake/build/lib:././.lake/packages/REPL/.lake/build/lib:./…	FALSE	Skipped as LEAN compilation failed
82	namespace myNameSpace Unable to analyze theorem MulAction.orbit.isBlock_of_normal {N : Subgroup G} [N.Normal] (a : X) : IsBlock G (orbit N a) := by rw [IsBlock.def_one] intro g rw [smul_orbit_eq_orbit_smul] apply orbit.eq_or_disjoint end myNameSpace	FALSE	✖ [11/13] Building TmpProjDir.Basic trace: .> LEAN_PATH=././.lake/packages/batteries/.lake/build/lib:././.lake/packages/Qq/.lake/build/lib:././.lake/packages/aesop/.lake/build/lib:././.lake/packages/proofwidgets/.lake/build/lib:././.lake/packages/Cli/.lake/build/lib:././.lake/packages/importGraph/.lake/build/lib:././.lake/packages/mathlib/.lake/build/lib:././.lake/packages/REPL/.lake/build/lib:./…	FALSE	Skipped as LEAN compilation failed
83	import Mathlib.Data.ENNReal.Operations import Mathlib.Data.ENNReal.Inv namespace myNameSpace open ENNReal open Set NNReal variable {a b c d : ℝ≥0∞} {r p q : ℝ≥0} theorem ENNReal.mul_le_of_le_div (h : a ≤ b / c) : a * c ≤ b := by rw [← inv_inv c] exact div_le_of_le_mul h end myNameSpace	TRUE		TRUE	{"tactics": [{"tactic": "rw [← inv_inv c]", "proofState": 0, "pos": {"line": 12, "column": 2}, "goals": "a b c : ℝ≥0∞ h : a ≤ b / c ⊢ a * c ≤ b", "endPos": {"line": 12, "column": 18}}, {"tactic": "exact div_le_of_le_mul h", "proofState": 1, "pos": {"line": 13, "column": 2}, "goals": "a b c : ℝ≥0∞ h : a ≤ b / c ⊢ a * c⁻¹⁻¹ ≤ b", "endPos": {"line": 13, "column": 26}}], "env": 0}
84	import Mathlib.Data.ENNReal.Operations import Mathlib.Data.ENNReal.Inv namespace myNameSpace open ENNReal open Set NNReal variable {a b c d : ℝ≥0∞} {r p q : ℝ≥0} theorem ENNReal.inv_le_iff_inv_le : a⁻¹ ≤ b ↔ b⁻¹ ≤ a := by simpa only [inv_inv] using @ENNReal.inv_le_inv a b⁻¹ end myNameSpace	TRUE		TRUE	{"tactics": [{"tactic": "simpa only [inv_inv] using @ENNReal.inv_le_inv a b⁻¹", "proofState": 0, "pos": {"line": 12, "column": 2}, "goals": "a b : ℝ≥0∞ ⊢ a⁻¹ ≤ b ↔ b⁻¹ ≤ a", "endPos": {"line": 12, "column": 54}}], "env": 0}
85	import Mathlib.Data.ENNReal.Operations import Mathlib.Data.ENNReal.Inv namespace myNameSpace open ENNReal open Set NNReal variable {a b c d : ℝ≥0∞} {r p q : ℝ≥0} theorem ENNReal.inv_two_add_inv_two : (2 : ℝ≥0∞)⁻¹ + 2⁻¹ = 1 := by rw [← two_mul, ← div_eq_mul_inv, ENNReal.div_self two_ne_zero two_ne_top] end myNameSpace	TRUE		TRUE	{"tactics": [{"tactic": "rw [← two_mul, ← div_eq_mul_inv, ENNReal.div_self two_ne_zero two_ne_top]", "proofState": 0, "pos": {"line": 12, "column": 2}, "goals": "⊢ 2⁻¹ + 2⁻¹ = 1", "endPos": {"line": 12, "column": 75}}], "env": 0}
86	namespace myNameSpace Unable to analyze theorem NumberField.ComplexEmbedding.IsReal.comp (f : k →+* K) {φ : K →+* ℂ} (hφ : IsReal φ) : IsReal (φ.comp f) := by ext1 x; simpa using RingHom.congr_fun hφ (f x) end myNameSpace	FALSE	✖ [11/13] Building TmpProjDir.Basic trace: .> LEAN_PATH=././.lake/packages/batteries/.lake/build/lib:././.lake/packages/Qq/.lake/build/lib:././.lake/packages/aesop/.lake/build/lib:././.lake/packages/proofwidgets/.lake/build/lib:././.lake/packages/Cli/.lake/build/lib:././.lake/packages/importGraph/.lake/build/lib:././.lake/packages/mathlib/.lake/build/lib:././.lake/packages/REPL/.lake/build/lib:./…	FALSE	Skipped as LEAN compilation failed
87	import Mathlib.Data.ENNReal.Operations import Mathlib.Data.ENNReal.Inv namespace myNameSpace open ENNReal open Set NNReal variable {a b c d : ℝ≥0∞} {r p q : ℝ≥0} theorem ENNReal.mul_div_mul_left (a b : ℝ≥0∞) (hc : c ≠ 0) (hc' : c ≠ ⊤) : c * a / (c * b) = a / b := by rw [div_eq_mul_inv, div_eq_mul_inv, ENNReal.mul_inv (Or.inl hc) (Or.inl hc'), mul_mul_mul_comm, ENNReal.mul_inv_cancel hc hc', one_m…	TRUE		TRUE	{"tactics": [{"tactic": "rw [div_eq_mul_inv, div_eq_mul_inv, ENNReal.mul_inv (Or.inl hc) (Or.inl hc'), mul_mul_mul_comm,\n ENNReal.mul_inv_cancel hc hc', one_mul]", "proofState": 0, "pos": {"line": 13, "column": 2}, "goals": "c a b : ℝ≥0∞ hc : c ≠ 0 hc' : c ≠ ⊤ ⊢ c * a / (c * b) = a / b", "endPos": {"line": 14, "column": 43}}], "env": 0}
88	import Mathlib.Data.ENNReal.Operations import Mathlib.Data.ENNReal.Inv namespace myNameSpace open ENNReal open Set NNReal variable {a b c d : ℝ≥0∞} {r p q : ℝ≥0} theorem ENNReal.div_ne_zero : a / b ≠ 0 ↔ a ≠ 0 ∧ b ≠ ⊤ := by rw [← pos_iff_ne_zero, div_pos_iff] end myNameSpace	TRUE		TRUE	{"tactics": [{"tactic": "rw [← pos_iff_ne_zero, div_pos_iff]", "proofState": 0, "pos": {"line": 12, "column": 2}, "goals": "a b : ℝ≥0∞ ⊢ a / b ≠ 0 ↔ a ≠ 0 ∧ b ≠ ⊤", "endPos": {"line": 12, "column": 37}}], "env": 0}
89	import Mathlib.Data.ENNReal.Operations import Mathlib.Data.ENNReal.Inv namespace myNameSpace open ENNReal open Set NNReal variable {a b c d : ℝ≥0∞} {r p q : ℝ≥0} theorem ENNReal.div_eq_zero_iff : a / b = 0 ↔ a = 0 ∨ b = ∞ := by simp [div_eq_mul_inv] end myNameSpace	TRUE		TRUE	{"tactics": [{"tactic": "simp [div_eq_mul_inv]", "proofState": 0, "pos": {"line": 12, "column": 2}, "goals": "a b : ℝ≥0∞ ⊢ a / b = 0 ↔ a = 0 ∨ b = ⊤", "endPos": {"line": 12, "column": 23}}], "env": 0}
90	import Mathlib.Data.ENNReal.Operations import Mathlib.Data.ENNReal.Inv namespace myNameSpace open ENNReal open Set NNReal variable {a b c d : ℝ≥0∞} {r p q : ℝ≥0} theorem ENNReal.div_eq_top : a / b = ∞ ↔ a ≠ 0 ∧ b = 0 ∨ a = ∞ ∧ b ≠ ∞ := by simp [div_eq_mul_inv, ENNReal.mul_eq_top] end myNameSpace	TRUE		TRUE	{"tactics": [{"tactic": "simp [div_eq_mul_inv, ENNReal.mul_eq_top]", "proofState": 0, "pos": {"line": 12, "column": 2}, "goals": "a b : ℝ≥0∞ ⊢ a / b = ⊤ ↔ a ≠ 0 ∧ b = 0 ∨ a = ⊤ ∧ b ≠ ⊤", "endPos": {"line": 12, "column": 43}}], "env": 0}
91	namespace myNameSpace Unable to analyze theorem NumberField.InfinitePlace.norm_embedding_eq (w : InfinitePlace K) (x : K) : ‖(embedding w) x‖ = w x := by nth_rewrite 2 [← mk_embedding w] rfl end myNameSpace	FALSE	✖ [11/13] Building TmpProjDir.Basic trace: .> LEAN_PATH=././.lake/packages/batteries/.lake/build/lib:././.lake/packages/Qq/.lake/build/lib:././.lake/packages/aesop/.lake/build/lib:././.lake/packages/proofwidgets/.lake/build/lib:././.lake/packages/Cli/.lake/build/lib:././.lake/packages/importGraph/.lake/build/lib:././.lake/packages/mathlib/.lake/build/lib:././.lake/packages/REPL/.lake/build/lib:./…	FALSE	Skipped as LEAN compilation failed
92	import Mathlib.Data.ENNReal.Operations import Mathlib.Data.ENNReal.Inv namespace myNameSpace open ENNReal open Set NNReal variable {a b c d : ℝ≥0∞} {r p q : ℝ≥0} theorem ENNReal.inv_le_iff_le_mul (h₁ : b = ∞ → a ≠ 0) (h₂ : a = ∞ → b ≠ 0) : a⁻¹ ≤ b ↔ 1 ≤ a * b := by rw [← one_div, ENNReal.div_le_iff_le_mul, mul_comm] exacts [or_not_of_imp h₁, not_or_of_imp h₂] end myNameSpace	TRUE		TRUE	{"tactics": [{"tactic": "rw [← one_div, ENNReal.div_le_iff_le_mul, mul_comm]", "proofState": 0, "pos": {"line": 12, "column": 2}, "goals": "a b : ℝ≥0∞ h₁ : b = ⊤ → a ≠ 0 h₂ : a = ⊤ → b ≠ 0 ⊢ a⁻¹ ≤ b ↔ 1 ≤ a * b", "endPos": {"line": 12, "column": 53}}, {"tactic": "exacts [or_not_of_imp h₁, not_or_of_imp h₂]", "proofState": 1, "pos": {"line": 13, "column": 2}, "goals": "case hb0\na b : ℝ≥0∞\nh₁ : b…
93	import Mathlib.Data.ENNReal.Operations import Mathlib.Data.ENNReal.Inv namespace myNameSpace open ENNReal open Set NNReal variable {a b c d : ℝ≥0∞} {r p q : ℝ≥0} theorem ENNReal.add_halves (a : ℝ≥0∞) : a / 2 + a / 2 = a := by rw [div_eq_mul_inv, ← mul_add, inv_two_add_inv_two, mul_one] end myNameSpace	TRUE		TRUE	{"tactics": [{"tactic": "rw [div_eq_mul_inv, ← mul_add, inv_two_add_inv_two, mul_one]", "proofState": 0, "pos": {"line": 12, "column": 2}, "goals": "a : ℝ≥0∞ ⊢ a / 2 + a / 2 = a", "endPos": {"line": 12, "column": 62}}], "env": 0}
94	namespace myNameSpace Unable to analyze theorem NumberField.InfinitePlace.not_isReal_of_mk_isComplex {φ : K →+* ℂ} (h : IsComplex (mk φ)) : ¬ ComplexEmbedding.IsReal φ := by rwa [← isComplex_mk_iff] end myNameSpace	FALSE	✖ [11/13] Building TmpProjDir.Basic trace: .> LEAN_PATH=././.lake/packages/batteries/.lake/build/lib:././.lake/packages/Qq/.lake/build/lib:././.lake/packages/aesop/.lake/build/lib:././.lake/packages/proofwidgets/.lake/build/lib:././.lake/packages/Cli/.lake/build/lib:././.lake/packages/importGraph/.lake/build/lib:././.lake/packages/mathlib/.lake/build/lib:././.lake/packages/REPL/.lake/build/lib:./…	FALSE	Skipped as LEAN compilation failed
95	namespace myNameSpace Unable to analyze theorem NumberField.InfinitePlace.isReal_or_isComplex (w : InfinitePlace K) : IsReal w ∨ IsComplex w := by rw [← not_isReal_iff_isComplex]; exact em _ end myNameSpace	FALSE	✖ [11/13] Building TmpProjDir.Basic trace: .> LEAN_PATH=././.lake/packages/batteries/.lake/build/lib:././.lake/packages/Qq/.lake/build/lib:././.lake/packages/aesop/.lake/build/lib:././.lake/packages/proofwidgets/.lake/build/lib:././.lake/packages/Cli/.lake/build/lib:././.lake/packages/importGraph/.lake/build/lib:././.lake/packages/mathlib/.lake/build/lib:././.lake/packages/REPL/.lake/build/lib:./…	FALSE	Skipped as LEAN compilation failed
96	import Mathlib.Order.Filter.Cofinite import Mathlib.Topology.Bornology.Basic namespace myNameSpace open Bornology open Set Filter variable {ι α β : Type*} variable {_ : Bornology α} {s t : Set α} {x : α} theorem Bornology.nonempty_of_not_isBounded (h : ¬IsBounded s) : s.Nonempty := by rw [nonempty_iff_ne_empty] rintro rfl exact h isBounded_empty end myNameSpace	TRUE		TRUE	{"tactics": [{"tactic": "rw [nonempty_iff_ne_empty]", "proofState": 0, "pos": {"line": 13, "column": 2}, "goals": "α : Type u_2 x✝ : Bornology α s : Set α h : ¬IsBounded s ⊢ s.Nonempty", "endPos": {"line": 13, "column": 28}}, {"tactic": "rintro rfl", "proofState": 1, "pos": {"line": 14, "column": 2}, "goals": "α : Type u_2 x✝ : Bornology α s : Set α h : ¬IsBounded s ⊢ s ≠ ∅", "endPos": {"line": 1…
97	import Mathlib.Order.Filter.Cofinite import Mathlib.Topology.Bornology.Basic namespace myNameSpace open Bornology open Set Filter variable {ι α β : Type*} variable {_ : Bornology α} {s t : Set α} {x : α} theorem Bornology.isBounded_union : IsBounded (s ∪ t) ↔ IsBounded s ∧ IsBounded t := by simp only [← isCobounded_compl_iff, compl_union, isCobounded_inter] end myNameSpace	TRUE		TRUE	{"tactics": [{"tactic": "simp only [← isCobounded_compl_iff, compl_union, isCobounded_inter]", "proofState": 0, "pos": {"line": 13, "column": 2}, "goals": "α : Type u_2 x✝ : Bornology α s t : Set α ⊢ IsBounded (s ∪ t) ↔ IsBounded s ∧ IsBounded t", "endPos": {"line": 13, "column": 69}}], "env": 0}
98	import Mathlib.Order.Filter.Cofinite import Mathlib.Topology.Bornology.Basic namespace myNameSpace open Bornology open Set Filter variable {ι α β : Type*} variable {_ : Bornology α} {s t : Set α} {x : α} theorem Bornology.isBounded_empty : IsBounded (∅ : Set α) := by rw [isBounded_def, compl_empty] exact univ_mem end myNameSpace	TRUE		TRUE	{"tactics": [{"tactic": "rw [isBounded_def, compl_empty]", "proofState": 0, "pos": {"line": 13, "column": 2}, "goals": "α : Type u_2 x✝ : Bornology α ⊢ IsBounded ∅", "endPos": {"line": 13, "column": 33}}, {"tactic": "exact univ_mem", "proofState": 1, "pos": {"line": 14, "column": 2}, "goals": "α : Type u_2 x✝ : Bornology α ⊢ univ ∈ cobounded α", "endPos": {"line": 14, "column": 16}}], "env": 0}
99	import Mathlib.Data.Finset.Lattice import Mathlib.Data.Set.Finite import Mathlib.Order.Closure import Mathlib.Order.UpperLower.Basic import Mathlib.Order.SupClosed namespace myNameSpace variable {F α β : Type*} variable [SemilatticeSup α] [SemilatticeSup β] variable {ι : Sort*} {S : Set (Set α)} {f : ι → Set α} {s t : Set α} {a : α} open Set open Set variable {ι : Type*} {f : ι → α} {s : Set α} {…	TRUE		TRUE	{"tactics": [{"tactic": "simp", "proofState": 0, "pos": {"line": 36, "column": 2}, "goals": "α : Type u_2\ninst✝⁶ : SemilatticeSup α\ninst✝⁵ : SemilatticeInf α\ninst✝⁴ : Lattice α\ninst✝³ : LinearOrder α\ninst✝² : SemilatticeSup α\ninst✝¹ : SemilatticeInf α\ninst✝ : Lattice α\n⊢ latticeClosure ∅ = ∅", "endPos": {"line": 36, "column": 6}}], "messages": [{"severity": "warning", "pos": {"line": 35, …
